# Supplementary material
Source: publisher figshare collection journal article supplement (https://acs.figshare.com/ndownloader/files/3920770)
Supplement: Supplementary file 1 [file 3920770]

Supporting Information for

## **Fully Solar-Powered Photoelectrochemical Conversion for Simultaneous Energy Storage and Chemical Sensing**

*Yongcheng Wang<sup>†</sup>, Jing Tang<sup>†</sup>, Zheng Peng<sup>†</sup>, Yuhang Wang<sup>†</sup>, Dingsi Jia<sup>†</sup>, Biao Kong<sup>†</sup>,  
Ahmed A. Elzatahry<sup>\*‡</sup>, Dongyuan Zhao<sup>†</sup>, and Gengfeng Zheng<sup>\*†</sup>*

<sup>†</sup> Laboratory of Advanced Materials, Department of Chemistry, Fudan University, Shanghai, 200433, People's Republic of China

<sup>‡</sup>Department of Chemistry, King Saud University, Riyadh 11451, Riyadh, Saudi Arabia

<sup>‡</sup> Polymer Materials Research Department, Advanced Technology and New Materials Research Institute, New Borg El-Arab City, Alexandria, Egypt

\* Address correspondence to: gfzheng@fudan.edu.cn.

## Methods

*Synthesis of the TiO<sub>2</sub> NW/NiO nanoflakes arrays.* TiO<sub>2</sub> NW arrays were synthesized by a modified hydrothermal method, in which a fluorine-doped tin oxide (FTO) substrate was used as the substrate for TiO<sub>2</sub> NW growth. After the growth, NiO nanoflakes were prepared by a modified chemical bath deposition method. Briefly, 16.5 g of NiSO<sub>4</sub>·6H<sub>2</sub>O, 2 g of K<sub>2</sub>S<sub>2</sub>O<sub>8</sub> and 5 mL of aqueous ammonia (25-28%) were added into 200 mL of H<sub>2</sub>O, then the FTO substrate containing the as-grown TiO<sub>2</sub> NW arrays was immersed in the solution and stirred for 30 min. The sample was then taken out and rinsed with water and annealed at 200 °C in argon for 1.5 h.

*Synthesis of Si NW/Pt arrays.* Si NW arrays were prepared by a metal-assisted etching method. Single crystalline, 0.01 Ω·cm *p*-Si (100) wafers were cleaned, and immersed in a solution contained 0.136 g of AgNO<sub>3</sub>, 10 mL of aqueous HF and 30 mL of H<sub>2</sub>O to form Ag nanoparticles, followed by etching in the solution contained 0.8 mL of H<sub>2</sub>O<sub>2</sub>, 10 mL of aqueous HF and 30 mL of H<sub>2</sub>O for 30-60 min. After etching, the Si NW arrays were immersed in a bath of concentrated nitric acid for 30 min to remove Ag. Pt nanoparticles were deposited onto Si NWs surfaces by an electroless metal deposition in a solution containing 2.5 mL of H<sub>2</sub>PtCl<sub>6</sub> (20 mM ) solution, 1 mL of aqueous HF and 50 mL of H<sub>2</sub>O for 10 min.

*PEC measurements.* Photocurrent measurement was carried out in a two-electrode configuration with the TiO<sub>2</sub>/NiO photoanode and the Si/Pt photocathode in a 0.5 M Na<sub>2</sub>SO<sub>4</sub> solution, by a CHI660D electrochemical workstation. The open circuit potential versus time measurement was carried out under the same configuration. Discharge measurement was carried out in a three-electrode configuration with TiO<sub>2</sub>/NiO as the working electrode, Pt foil as the counter electrode, and Ag/AgCl as the reference electrode. A 0.5 M Na<sub>2</sub>SO<sub>4</sub> was used as the electrolyte. The discharge measurement was performed by galvanostatic discharge tests. The specific capacitance was calculated by:  $C = I * \Delta t / (M * \Delta V)$ , where  $C$  (F g<sup>-1</sup>) is the specific capacitance,  $I$  (A),  $\Delta t$  (s),  $M$  (g), and  $\Delta V$  (V) represent the discharge current, the total

discharge time, the mass of active materials, and the potential drop during discharge, respectively.

*Sensing measurements.* In the solar energy driving mode, the  $\text{TiO}_2/\text{NiO}$  photoanode and the Si/Pt photocathode are connected in the aforementioned 2-electrode configuration. In the pseudocapacitive energy driving mode, a 3-electrode configuration is used, with the  $\text{TiO}_2/\text{NiO}$  photoanode, a Pt foil and a Ag/AgCl as the working, counter and reference electrodes, respectively.

## Supporting Figures

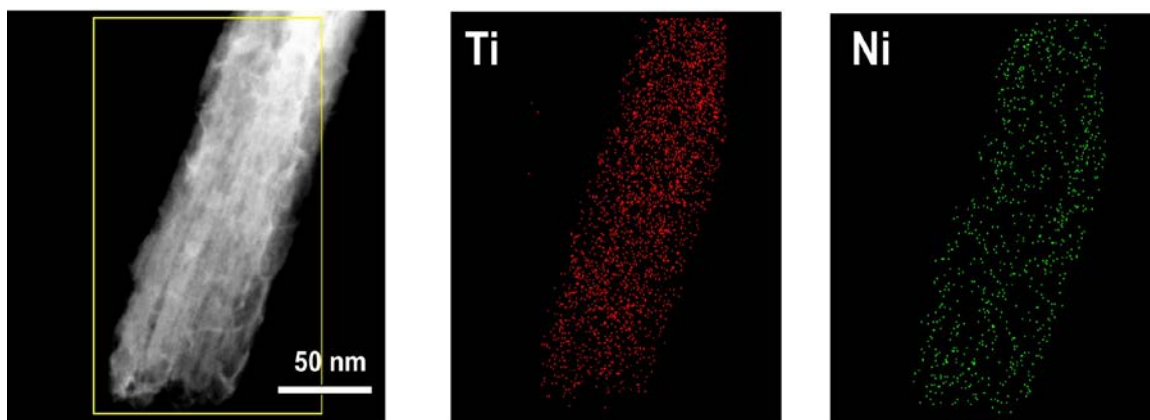

**Figure S1.** TEM image and the energy dispersive X-ray spectroscopy (EDX) elemental mappings of Ti and Ni of  $\text{TiO}_2/\text{NiO}$  composite.

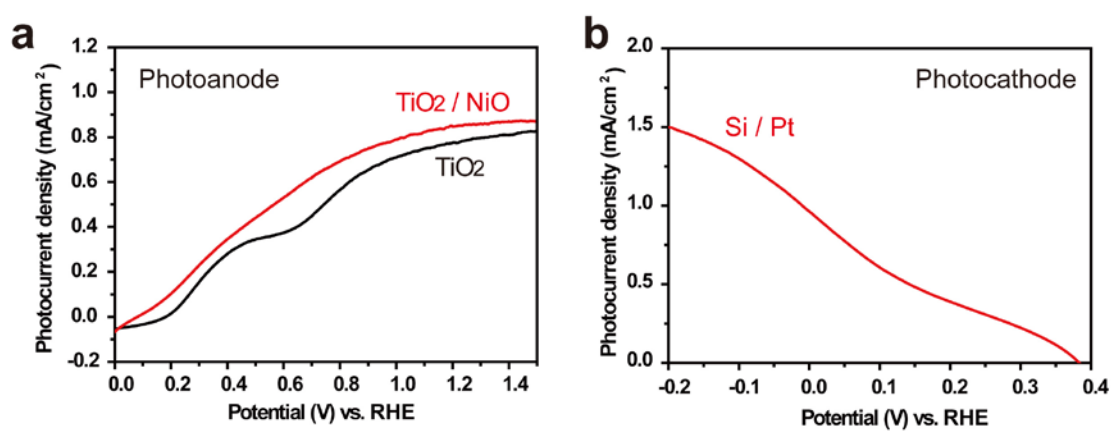

**Figure S2.** Photocurrent densities of (a)  $\text{TiO}_2$  NW and  $\text{TiO}_2/\text{NiO}$  photoanodes, and (b) Si/Pt photocathode, using the 3-electrode configuration in 0.5 M  $\text{Na}_2\text{SO}_4$  electrolyte.

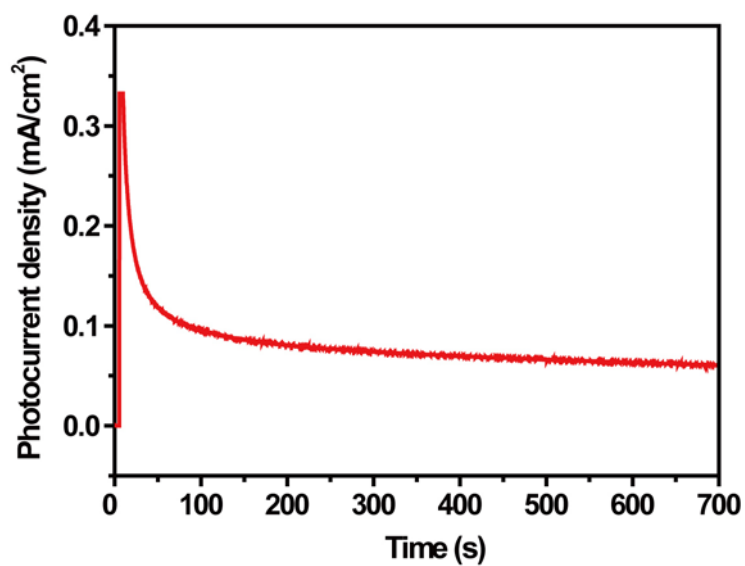

**Figure S3.** Photocurrent density versus time measured at short-circuited connection of the TiO<sub>2</sub>/NiO photoanode and Si/Pt photocathode.

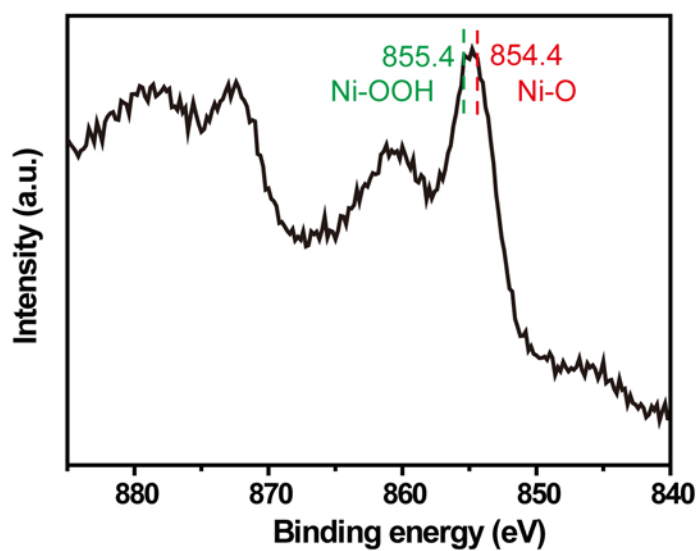

**Figure S4.** XPS spectra of the TiO<sub>2</sub>/NiOOH photoanode. The Ni 2p<sub>3/2</sub> peaks are indicated by arrows.

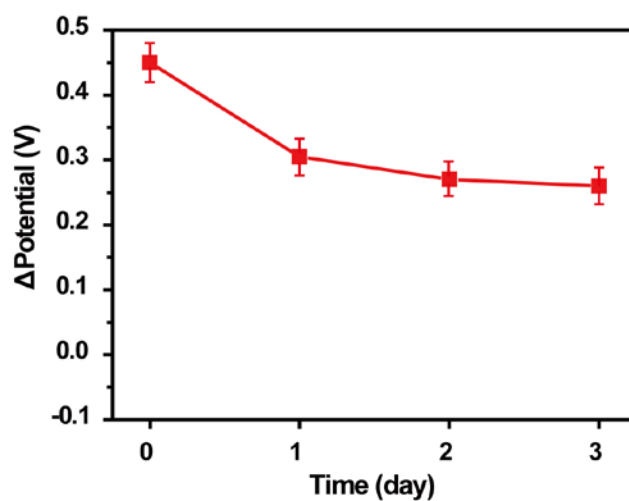

**Figure S5.** Open circuit voltage stability of the  $\text{TiO}_2/\text{NiOOH}$  sample after fully charged by sun light.

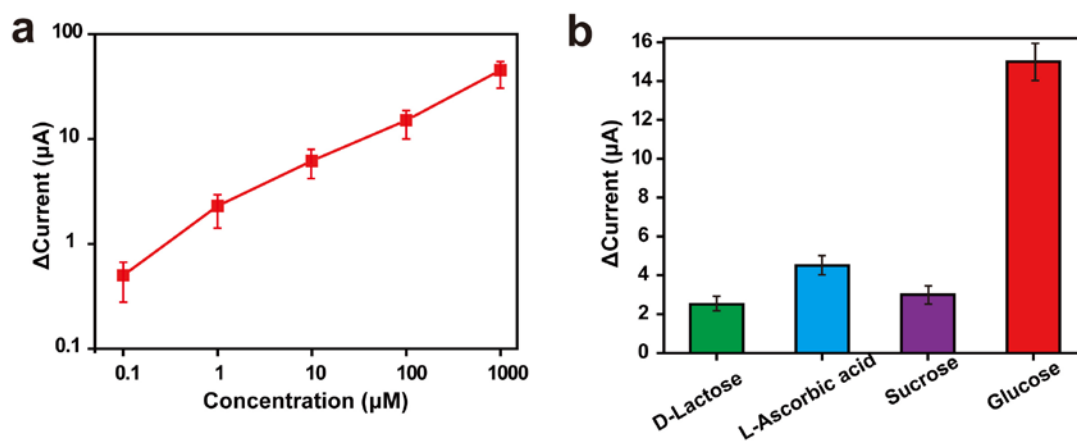

**Figure S6.** (a) Concentration dependence curve of the glucose detection by the  $\text{TiO}_2/\text{NiO}$  photoanodes under the sun light illumination. (b) Glucose selectivity compared to D-lactose, L-ascorbic acid, and sucrose, for the  $\text{TiO}_2/\text{NiO}$  photoanodes.
